# Supplementary material
Source: PubMed Central journal article supplement (PMC3745715)
Supplement: Supplemental_table_487.pdf [file Supplemental_table_487.pdf]

## Supplemental table. Univariable analyses (Grade I versus non-grade I)

### A. Patient factors associated with embryo grade<sup>1</sup>

| Risk Factors                 | Grade I embryos                  | Non-grade I embryos              | P value <sup>2</sup> |
|------------------------------|----------------------------------|----------------------------------|----------------------|
| ATRA (pmol/mL)               | 7.4 (5.2,9.5) 29 <sup>3</sup>    | 4.5 (3.6,5.4) 102                | 0.024                |
| Age (years)                  | 35.9 (34.0,37.8) 23 <sup>4</sup> | 34.1 (32.8,35.3) 53 <sup>5</sup> | 0.12                 |
| BMI (kg/m <sup>2</sup> )     | 28.5 (25.8,31.2) 23              | 25.2 (23.4,27.0) 53              | 0.05                 |
| Day 3, FSH (IU/L)            | 8.6 (7.0,10.1) 22                | 8.2 (7.2,9.2) 47                 | 0.69                 |
| Peak E2 (pg/mL)              | 1958 (1528,2388) 23              | 1876 (1592,2159) 53              | 0.75                 |
| Total gonadotropins(pmol/mL) | 3538 (2779,4297) 23              | 3140 (2640,3640) 53              | 0.39                 |
| Antral follicle count (AFC)  | 19.0 (12.6,25.4) 23              | 24.1 (19.9,28.3) 53              | 0.18                 |

<sup>1</sup>176 women and 131 follicles were evaluated: 23 women (29 follicles) with grade I and 53 women (102 follicles) with non-grade I (regardless of oocyte quality or recovery).

<sup>2</sup>Grade I versus non-grade I

<sup>3</sup>Mean (95% confidence interval) number of follicles. Means are model-based means (not raw means) obtained from a repeated measures analysis of ATRA concentration from each ovary. The model-based means are the estimated means taking into consideration the fact that not all women have ATRA measurements from both ovaries.

<sup>4</sup>Mean (95% confidence interval) number of women with at least one grade I embryo from the two follicles studied.

<sup>5</sup>Mean (95% confidence interval) number of women with no grade I embryos from the two follicles studied.

### B. Logistic regression models of embryo grade<sup>1</sup> by ATRA concentrations

| Tertile Groups ATRA (pmol/mL) | Grade I       | Non-Grade I    | Odds Ratio (OR) <sup>2</sup> | OR (95% CI) <sup>3</sup> | P Value <sup>4</sup> |
|-------------------------------|---------------|----------------|------------------------------|--------------------------|----------------------|
| ≤3.70 <sup>5</sup>            | 17.2% (5/29)  | 37.3% (38/102) | 1.0                          | 1.0                      | 0.034                |
| >3.70-5.79                    | 31.0% (9/29)  | 35.3% (36/102) | 1.90                         | 1.86 (0.93,3.72)         |                      |
| >5.79                         | 51.7% (15/29) | 27.5% (28/102) | 4.07                         | 3.04 (1.32,7.00)         |                      |

<sup>1</sup>Grade I versus non-grade I

<sup>2</sup>Independence model

<sup>3</sup>Generalized estimating equations (GEE) for clustered data model

<sup>4</sup>Calculated from the GEE clustered data model

<sup>5</sup>The first/lowest ATRA tertile (≤ 3.70 pmol/mL) is the reference level
